# Supplementary material for: Practice Profile of Practicing Plastic Surgeons: A 20-year Review of Plastic Surgery Statistics
Source: PubMed Central journal article supplement — Plast Reconstr Surg Glob Open. 2023 Dec 22;11(12):e5486. doi: 10.1097/GOX.0000000000005486 (PMC10745238; doi:10.1097/gox.0000000000005486), 2023-12-22
Supplement: gox-11-e5486-s001.pdf [file gox-11-e5486-s001.pdf]

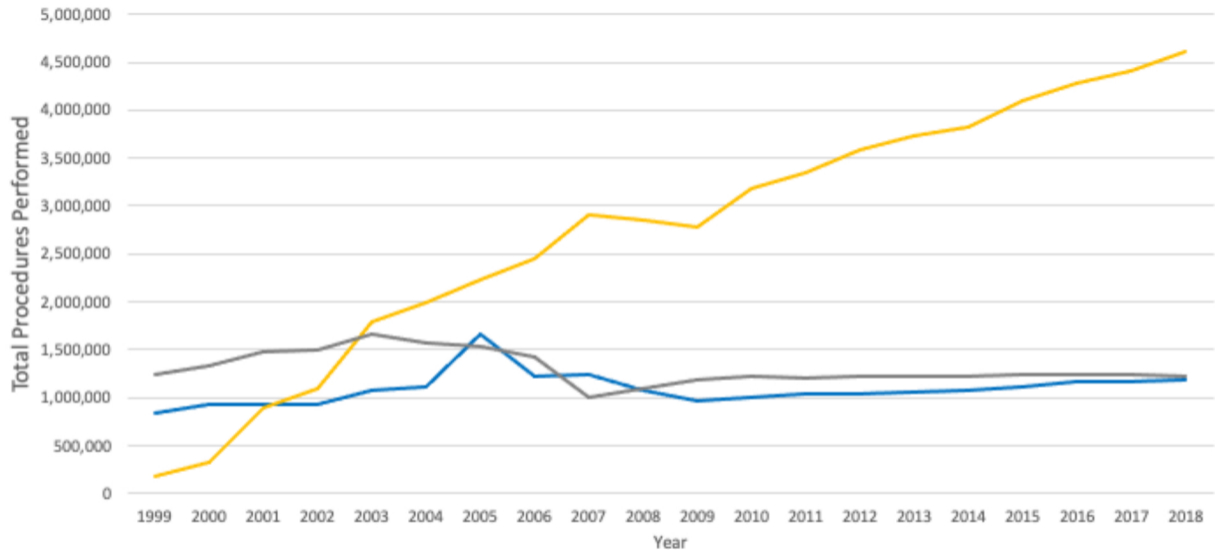

— Aesthetic Surgical Procedures — Aesthetic Minimally Invasive Procedures — Reconstructive Procedures
